# Supplementary material for: Oviposition Dynamics and Niche Utilization in Two Sympatric Drosophila Species
Source: PubMed Central journal article supplement (PMC11794365; doi:10.1007/s10886-025-01576-4), 2025-02-04

# UMAP plot

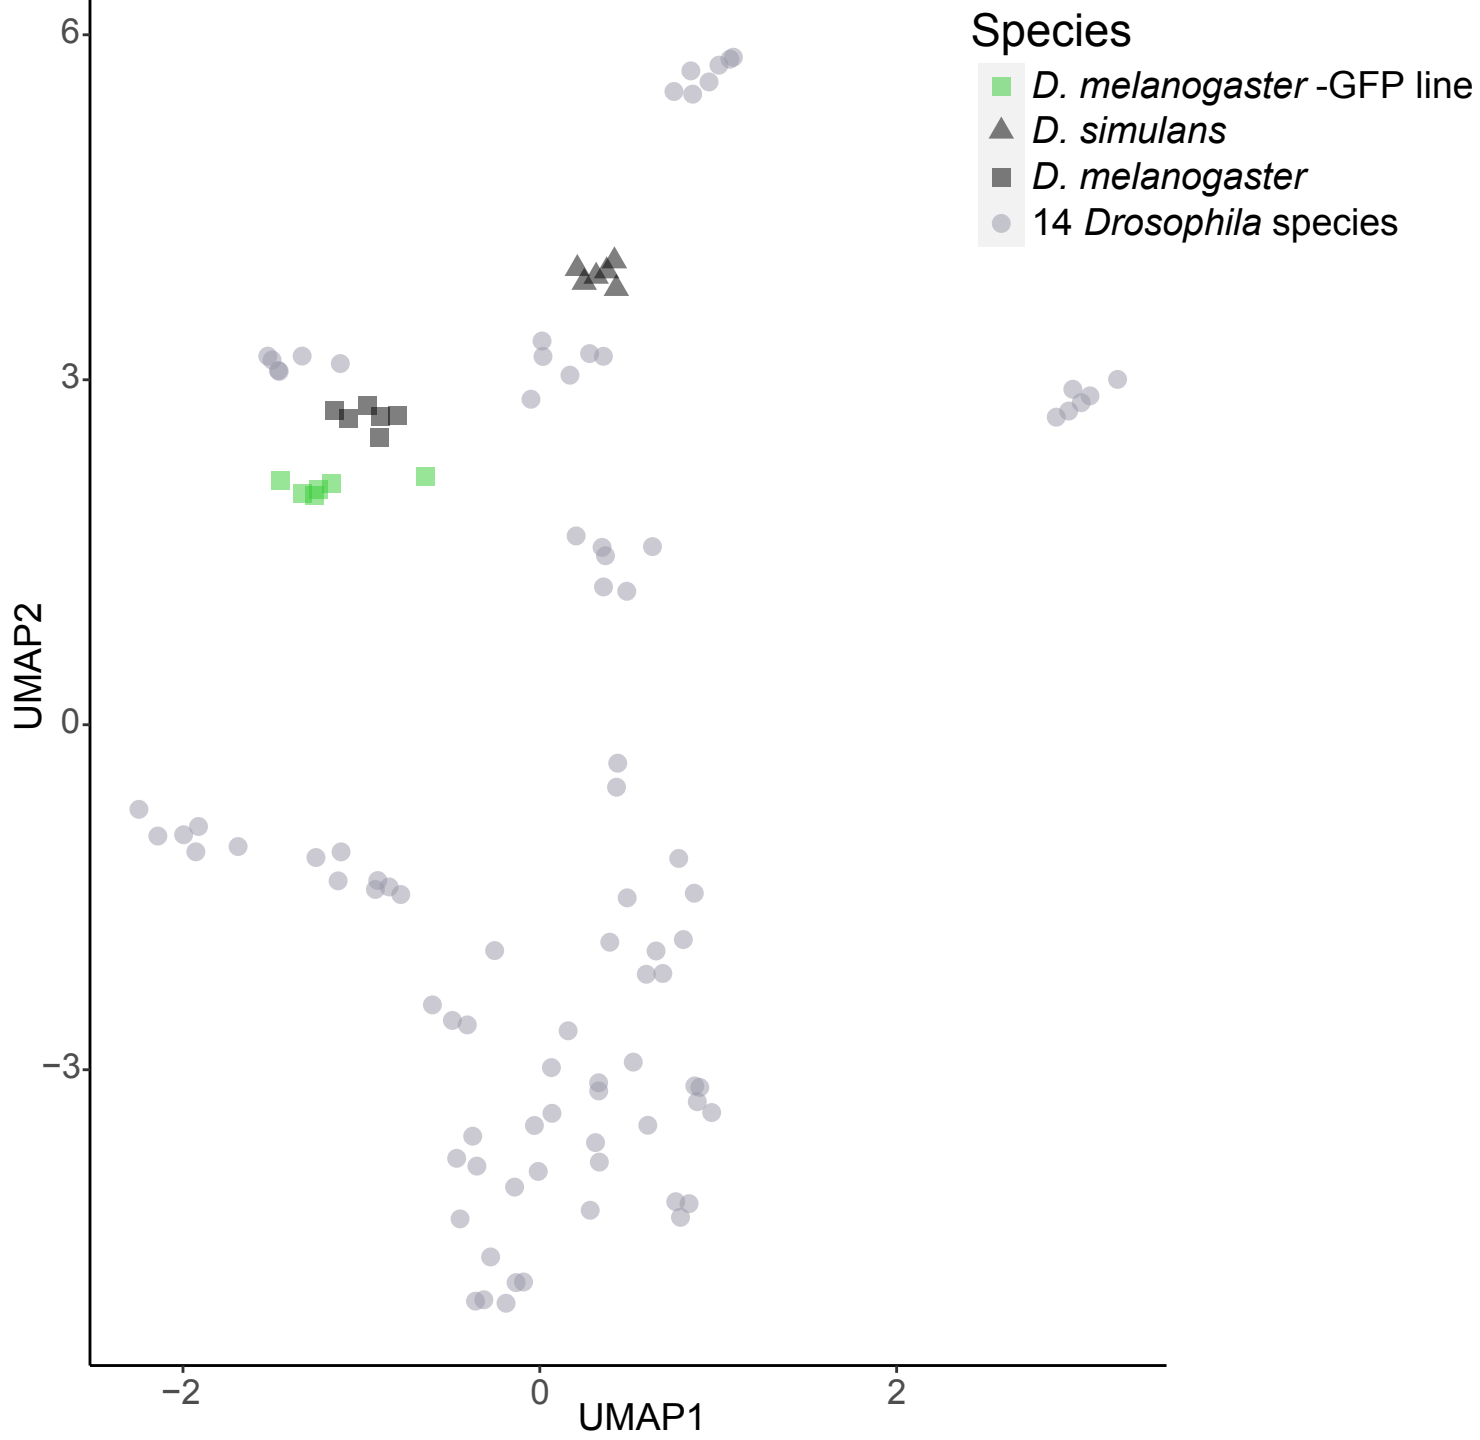

Supplement: 10886_2025_1576_MOESM4_ESM.pdf [file 10886_2025_1576_MOESM4_ESM.pdf]
